# Supplementary material
Source: PubMed Central journal article supplement (PMC4202259)

Age 29

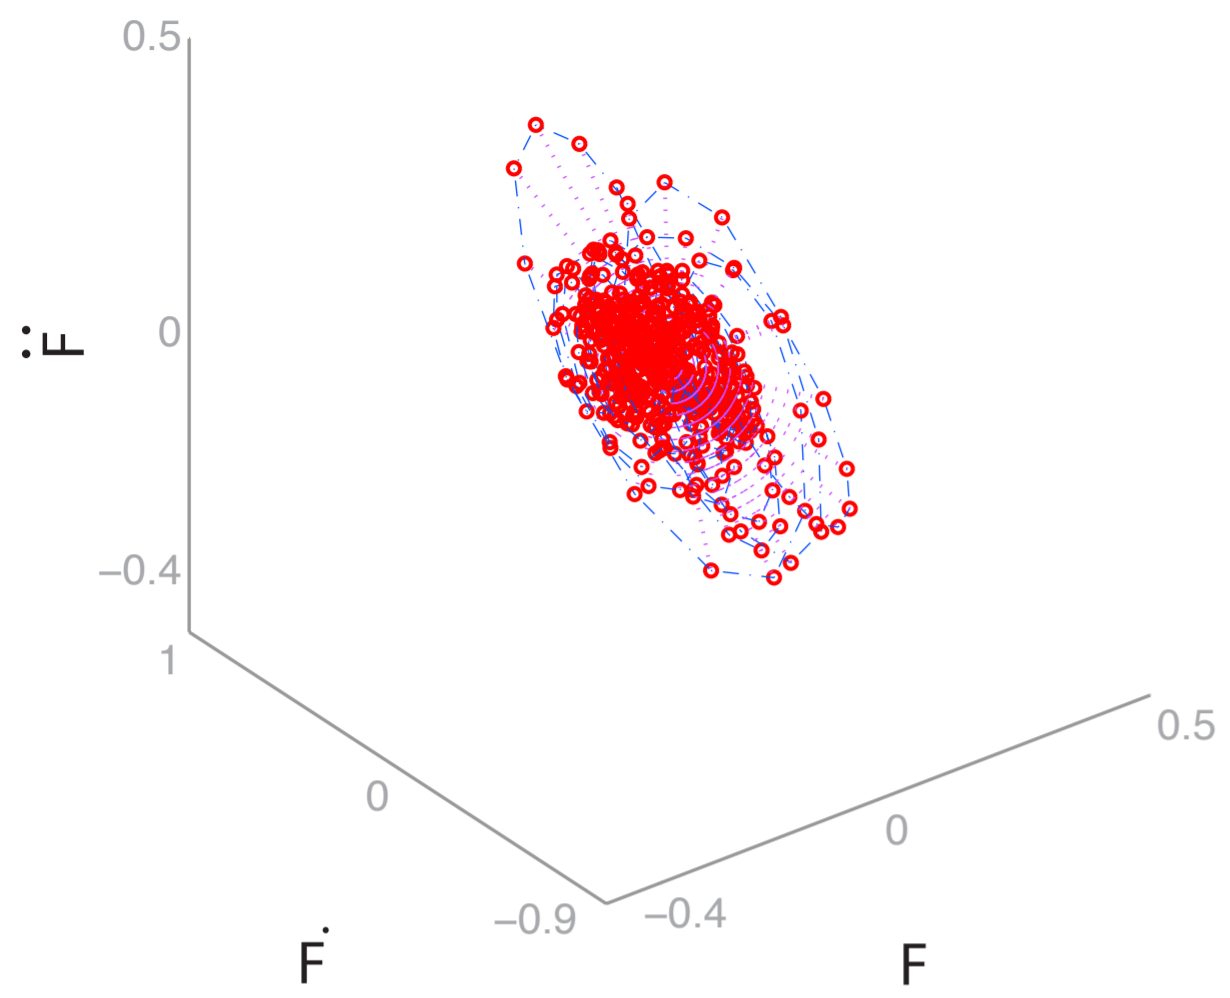

Age 59

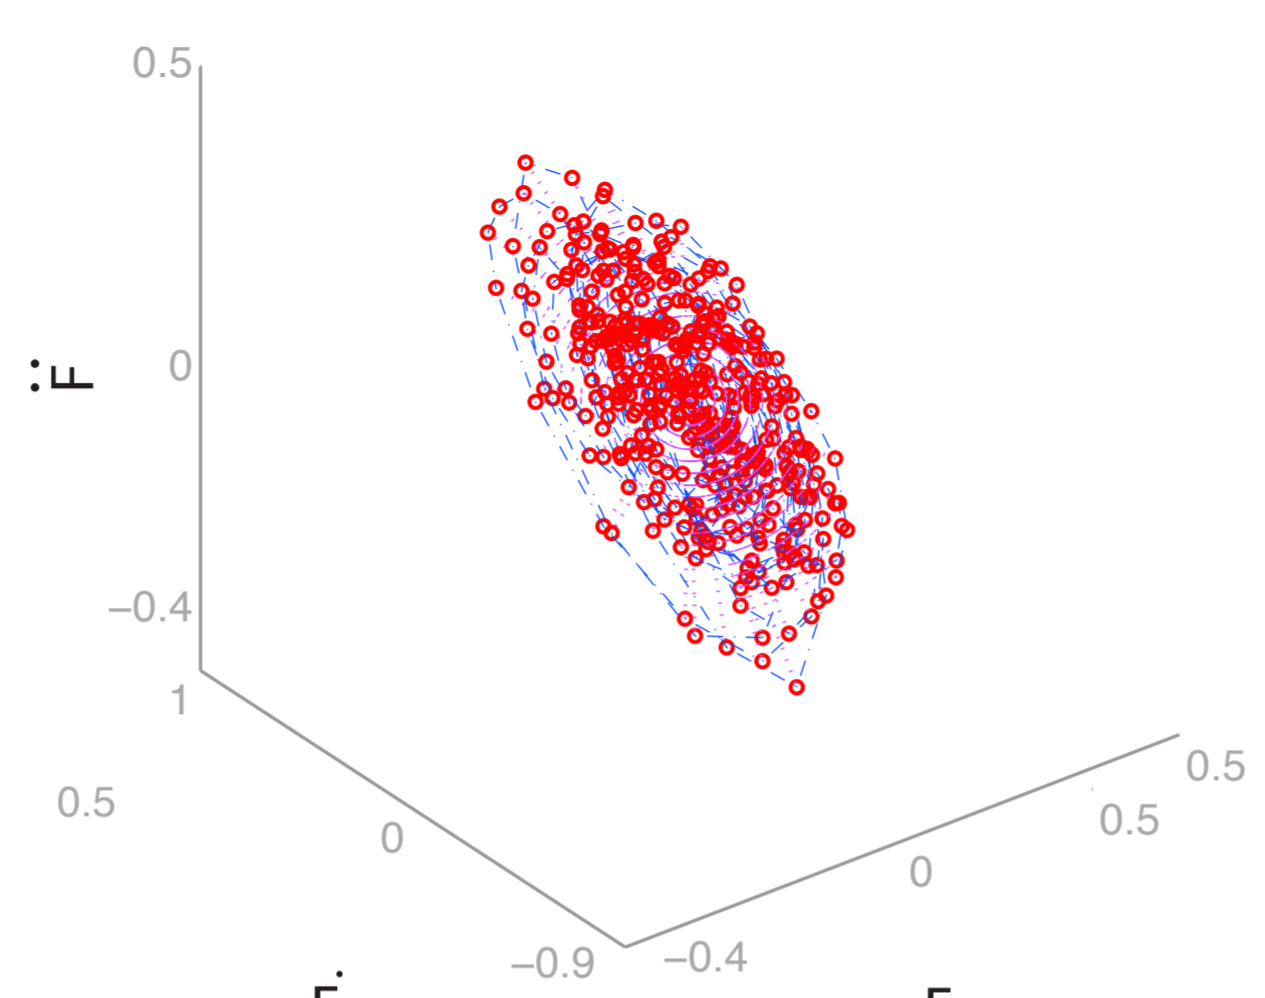

Age 84

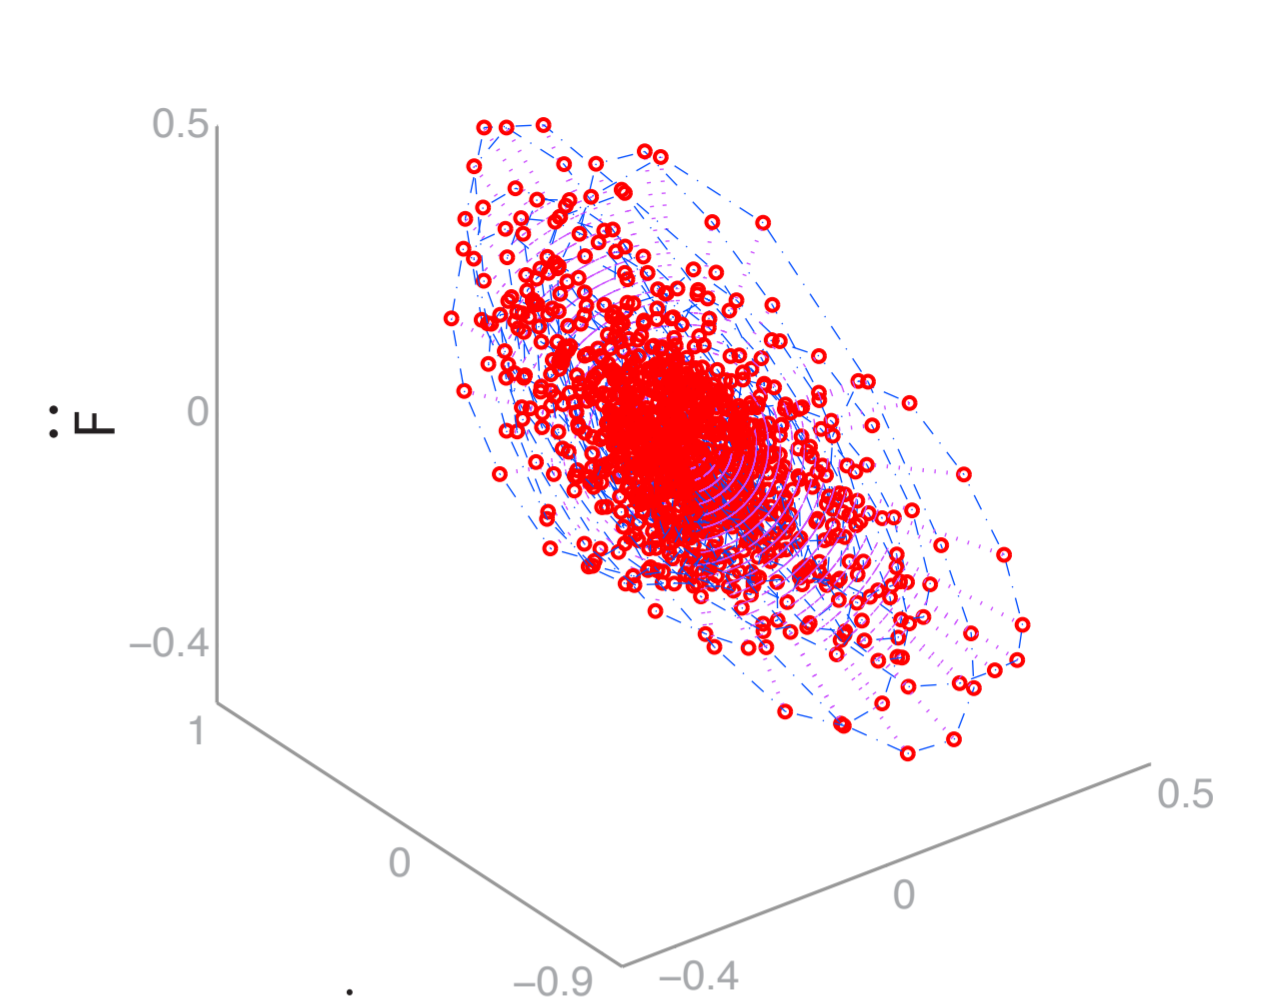

Euclidean length in state space per second

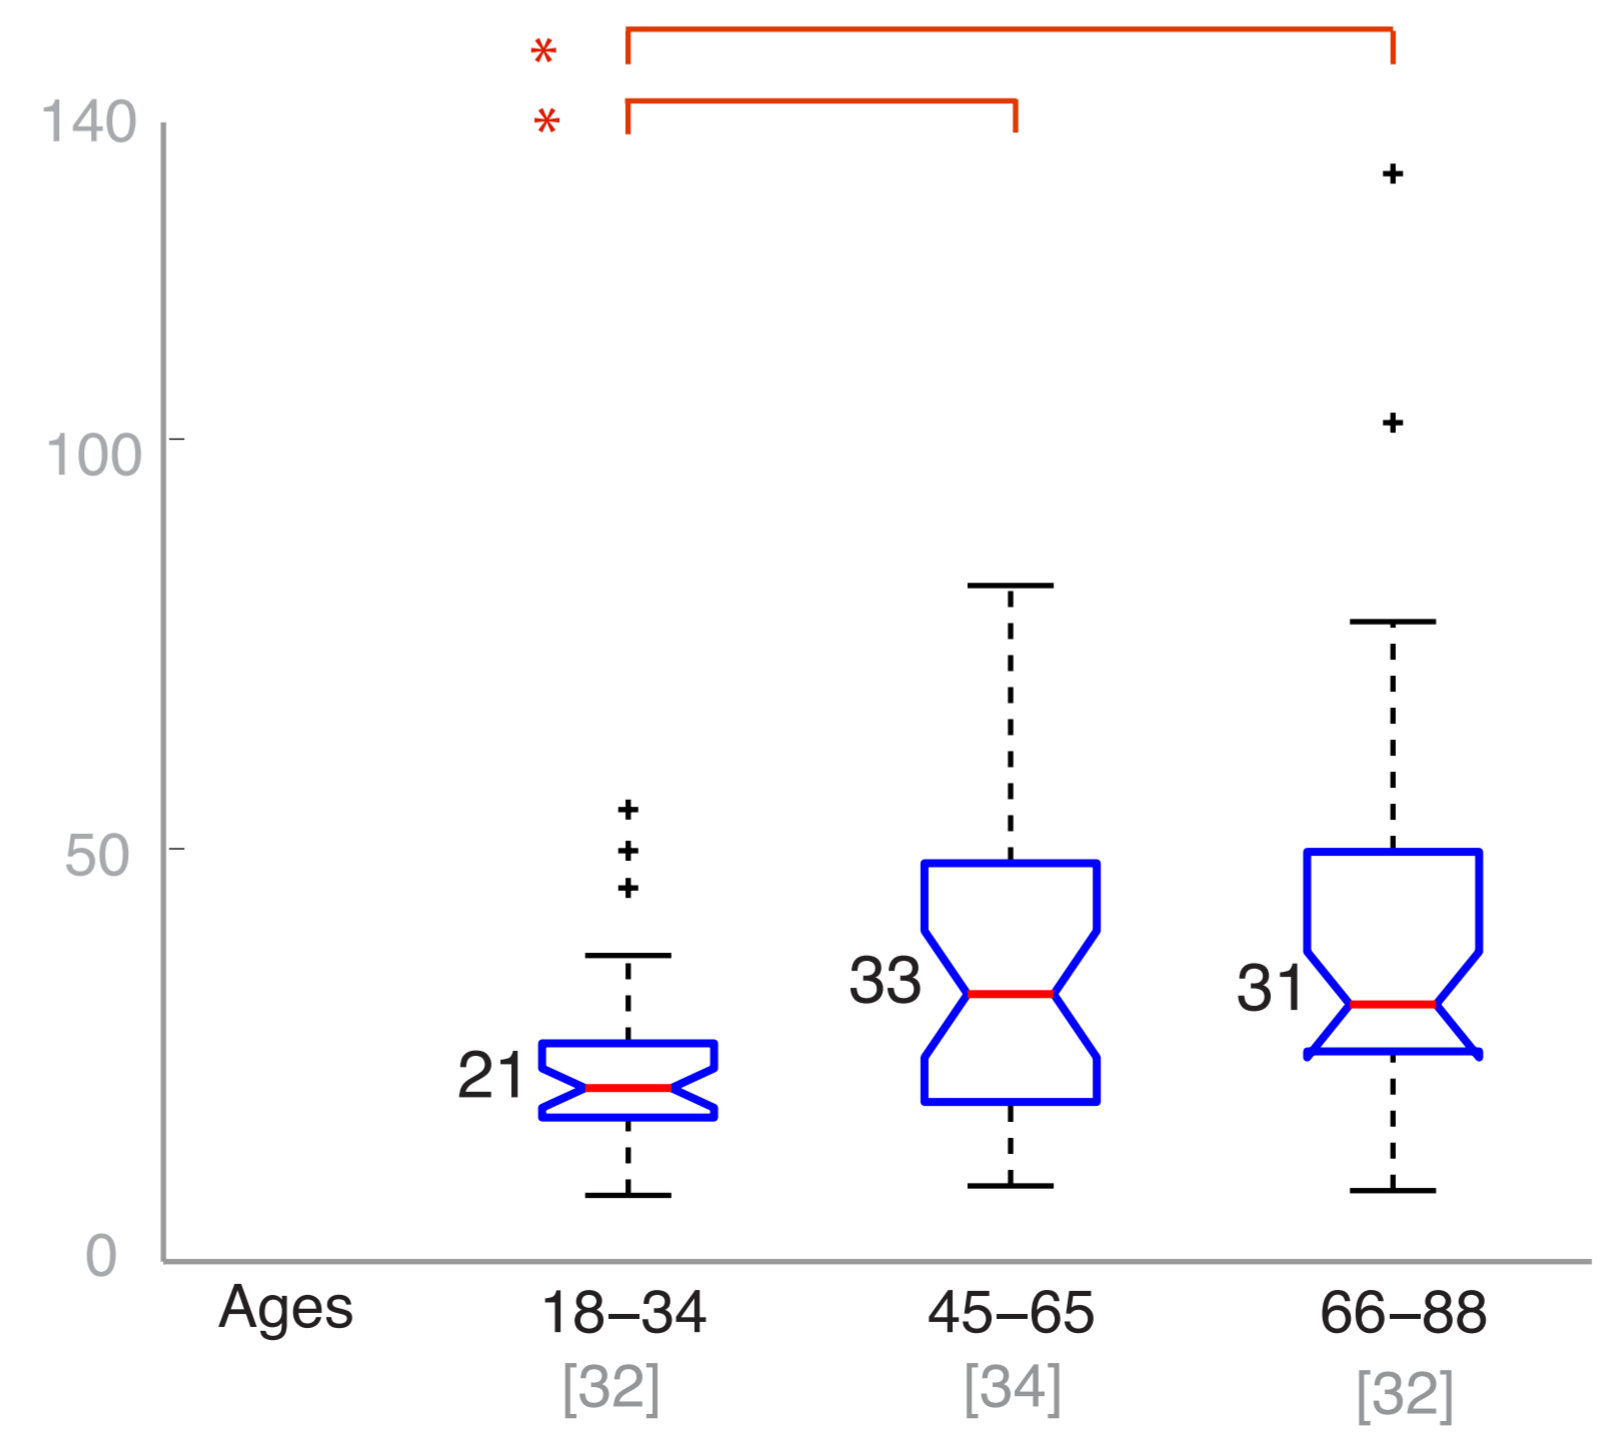

Supplement: supp_glu025_SuppleFig1_DynamicsAdults.pdf [file supp_glu025_SuppleFig1_DynamicsAdults.pdf]
